# Supplementary material for: Comprehensive rear surface passivation of superstrate Sb2Se3 solar cells via post-deposition selenium annealing treatments and the application of an electron blocking layer
Source: Royal Society of Chemistry journal article supplement (doi:10.1039/d1fd00056j), 2021-09-28
Supplement: d1fd00056j1.pdf [file d1fd00056j1.pdf]

*Electronic Supplementary Information*

Comprehensive rear surface passivation of superstrate  $\text{Sb}_2\text{Se}_3$  solar cells via post-deposition selenium annealing treatments and the application of an electron blocking layer

Giuk Jeong, Seunghwan Ji, Jiwoon Choi, Jihun Jung, and Byungha Shin\*

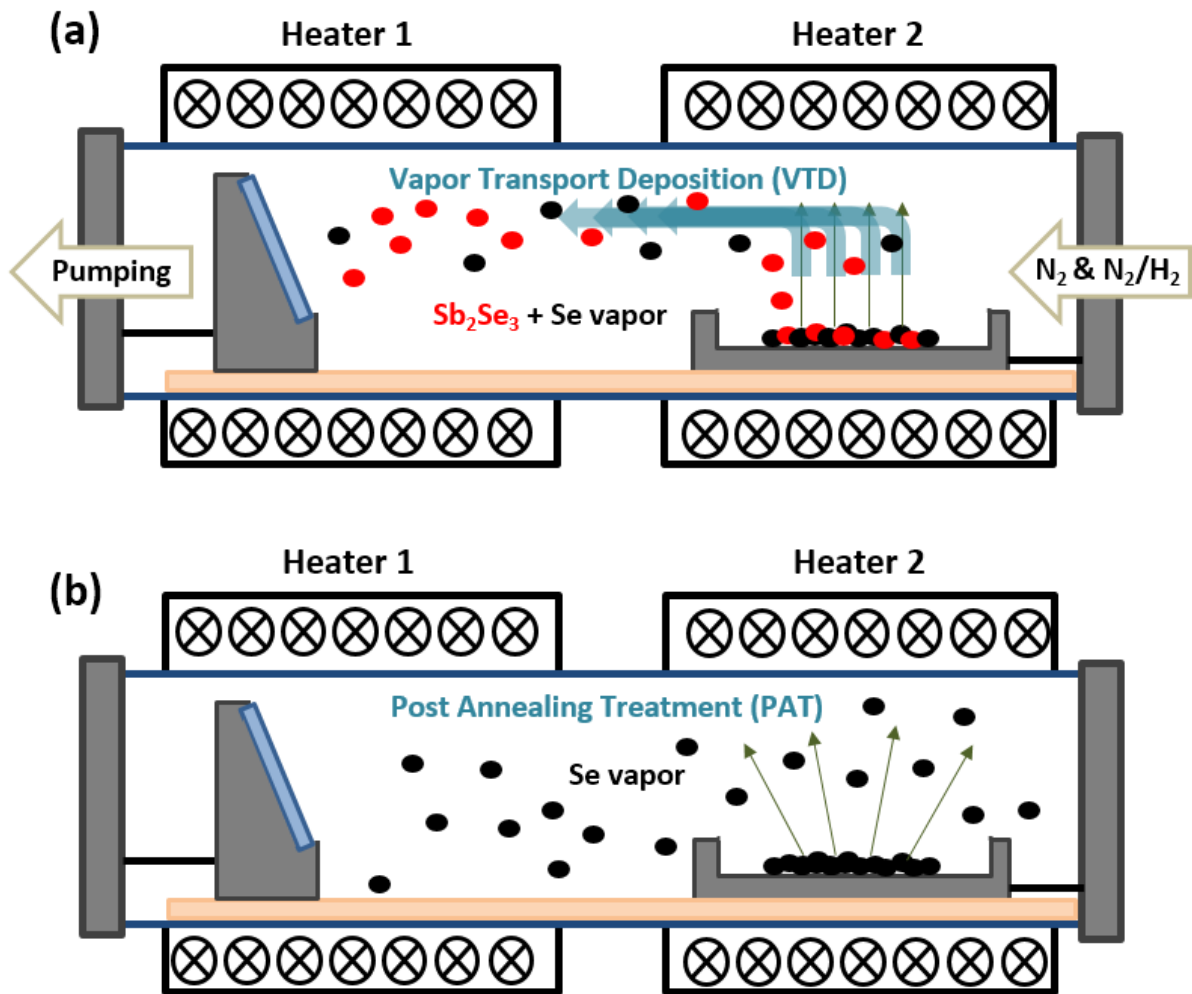

Figure. S1 (a) Schematic of Vapor Transport Deposition and (b) post-deposition Se annealing treatments

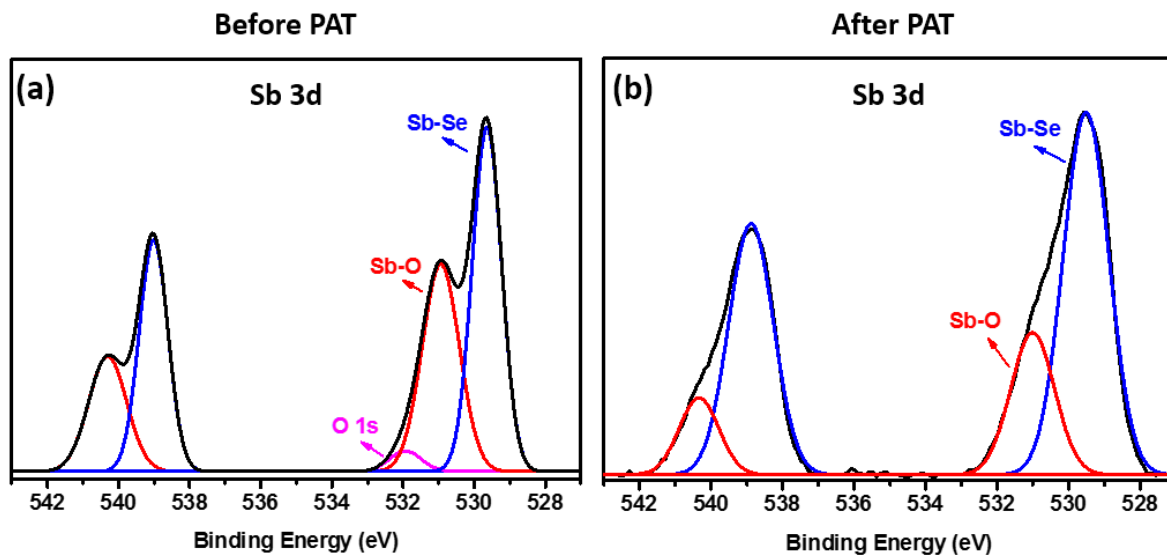

Figure. S2 XPS surface Sb peak before PAT (a) and after PAT (b)

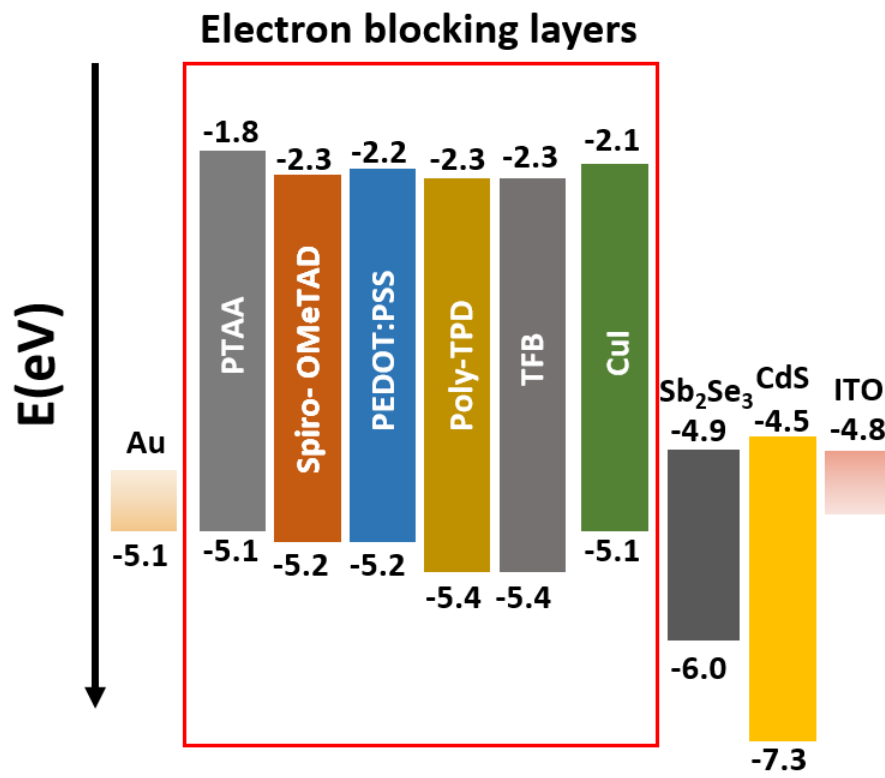

**Figure. S3** Band alignments between Sb<sub>2</sub>Se<sub>3</sub> and various candidates for an electron blocking layer used in our study

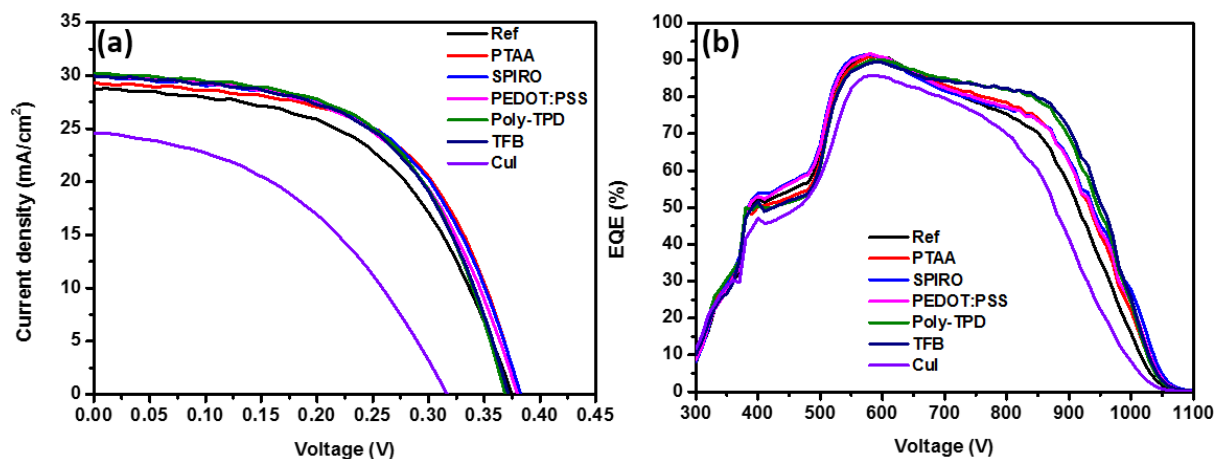

**Figure. S4** Effects of various electron blocking layers on device performance

**Table S1.** Photovoltaic properties of Sb<sub>2</sub>Se<sub>3</sub> solar cells with different electron blocking layers

| Batch                                 | Ref.  | PTAA  | SPIRO | PEDOT:PSS | Poly-TPD | TFB   | CuI   |
|---------------------------------------|-------|-------|-------|-----------|----------|-------|-------|
| V <sub>oc</sub> (V)                   | 0.374 | 0.381 | 0.382 | 0.380     | 0.368    | 0.372 | 0.316 |
| J <sub>sc</sub> (mA/cm <sup>2</sup> ) | 28.7  | 29.2  | 29.8  | 30.0      | 30.1     | 29.9  | 24.5  |
| Efficiency (%)                        | 5.7   | 6.4   | 6.4   | 6.2       | 6.3      | 6.2   | 3.4   |
| Fill Factor (%)                       | 53.4  | 57.3  | 55.8  | 54.6      | 57       | 56    | 43.6  |
